# Supplementary material for: GABAergic dysfunction in Parkinson’s disease: Insights from in vivo proton magnetic resonance spectroscopy
Source: Research Square preprint supplement (doi:10.21203/rs.3.rs-8407027/v1), 2025-12-30
Supplement: Supplementary file 1 [file 4d0f8d63f2ec66ac8795e364.docx]

**Table-3**: Data analysis method and results of studies evaluating GABA in patients with Parkinson’s disease

| **Authors, year** | **Software** | **Output measures** | **Quantification reference** | **GABA/ GABA+** | **Key results** |
| --- | --- | --- | --- | --- | --- |
| Oz et al,  2006 [25] | LCModel | GABA | NAA | Values NR.  No difference between PD and HC. | -Unique neurochemical profile of the SN can be measured using STEAM spectroscopy at 4T.  -Trends observed between PD and HC. |
| Emir et al,  2012 [26] | LCModel | GABA | Water | Pons- PD: 1.66 ± 0.4,  HC: 1.06 ± 0.2;  Putamen- PD: 2.16 ± 0.4,  HC: 1.66 ± 0.2  SN- Values NR.  No difference between PD and HC | -Significantly ↑ GABA in the pons and putamen in PD. |
| Dharmadhikari et al, 2015 [27] | LCModel 6.2-0R | GABA+ | Water | Thalamus - PD: 2.06 ± 0.09, HC: 1.73 ± 0.09;  Striatum: Values NR.  No difference between PD and HC. | -PD has ↑ thalamic GABA compared to HC.  -This may contribute to their different processing of proprioceptive information.  -Dissociable roles of striatal and thalamic GABA, with striatal GABA affecting response speed and thalamic GABA affecting response conflict. |
| O'Gormon Tuura et al, 2018 [28] | LCModel 6.31-H | GABA+ | Water | Left BG- PD: 4.61 ± 0.57,  HC: 3.93 ± 0.75;  Left PFC- PD: 3.48 ± 0.90, HC: 2.96 ± 0.96 | -PD had significantly ↑ GABA in the BG which correlated with gait disturbances.  -PFC GABA negatively correlated with postural stability in AR PD and PFC Glx negatively correlated with difficulties turning in bed.  -Associations were more pronounced in AR vs TDPD |
| Elmaki et al,  2018 [29] | Gannet | GABA+ | Water | PD: 1.31 ± 0.21,  HC: 1.62 ± 0.26 | -GABA+ levels were significantly ↓ in PD  -Suggesting a role for GABAergic dysfunction in PD pathogenesis. |
| Gong et al,  2018[30] | Gannet 2.0 | GABA+ | Water | TDPD: 1.15 ± 0.16,  PIGD: 1.36 ± 0.18,  HC: 1.56 ± 0.23 | -GABA+ levels were significantly ↓in PD BG compared to HC.  -TDPD subtype had ↓ GABA+ levels than the PIGD subtype.  -Significant negative correlation between GABA+ levels and UPDRS scores in the PIGD group, but not in the TDPD. |
| O'Gormon Tuura et al, 2018 [31] | LCModel | GABA+ | Water | Values NR.  BG: PD>HC | -BG GABA levels were significantly ↑ and pontine Glx levels were significantly ↓ in PD compared to HC.  -BG Glx levels were a significant predictor of DBS outcome, indicating a role for glutamatergic neurotransmission in therapeutic mechanisms.  -Pontine Gln negatively correlated with motor outcomes post-DBS. |

| **Authors, year** | **Software** | **Output measures** | **Quantification reference** | **GABA/ GABA+** | **Key results** |
| --- | --- | --- | --- | --- | --- |
| Firbank et al,  2018 [32] | Gannet  AMARES (jMRUI) | GABA+ | tCr | PD+VH: 0.091 ± 0.01;  PD-VH: 0.101 ± 0.01;  HC: 0.099 ± 0.01 | PD+VH has lower occipital GABA compared to PD-VH and HC. |
| Pesch et al,  2019 [33] | LCModel 6.2-0R | GABA | Water | Striatum-  PD: 2.0(1.8-2.2),  HC: 1.9 (1.8-2.1);  Thalamus-  PD: 2.1 (1.9-2.4),  HC: 1.9 (1.7-2.4) | -Striatal GABA correlated with MDS-UPDRS III.  -AR PD patients had ↓ Glx but ↑ thalamic GABA.  -Thalamic Glx was linked to larger tremor amplitudes. |
| Piras et al,  2020 [34] | Gannet 3.0 | GABA | Water | Mean cerebellar-  PD: 3.59 ± 0.61,  HC: 3.48 ± 0.46;  Left cerebellar –  PD: 3.55 ± 0.96,  HC: 3.53 ± 0.56;  Right cerebellar –  PD: 3.62 ± 0.82  HC: 3.44 ± 0.54 | -↑ cerebellar GABA levels are associated with ↑ cognitive deficits in PD.  -Non-dopaminergic basis for cognitive deficits in PD and highlights the role of cerebellum in cognitive processes. |
| van Nuland et al, 2020 [35] | LCModel | GABA | tCr | Values NR.  No significant differences between PD and HC. | -GABA levels were not significantly altered by PD, clinical phenotype, or medication.  -MC GABA levels inversely correlated with disease severity, particularly rigidity and tremor, in OFF and ON medication states.  -Potential modulatory or neuroprotective role of GABA in Parkinson's disease. |
| Delli Pizzi et al, 2020 [36] | Gannet 3.0 | GABA+ | tCr | PD+SSD: 0.10 ± 0.02,  PD-SSD: 0.08 ± 0.02;  SSD: 0.11 ± 0.02;  HC: 0.08 ± 0.02 | -PD+SSD and SSD have ↑ GABA in mPFC compared to PD-SSD and HC.  -May be a functional signature of SSD, independent of PD pathology. |
| Parkin et al,  2021[37] | Gannet 3.0 | GABA+ | tCr | Values NR.  Reduced GABA in PD vs HC. | Instruction-based learning linked to ↓ GABA levels in the mid-DLPFC. |
| Song et al,  2021[38] | Gannet 3.0 | GABA+ | Water | OFF state:2.40 ± 0.77,  ON state: 3.29 ± 0.61,  HC: 3.50 ± 0.79 | -Upper brainstem OFF state GABA+ levels were significantly ↓ than HC.  -ON state GABA+ levels significantly ↑ in PD.  -Levodopa may help normalize GABA+ levels and contribute to improved motor function in PD. |
| Song et al, 2021[39] | Gannet | GABA+ | Water | PD: 4.57 ± 0.94,  HC: 5.89 ± 1.16 | -GABA + levels are significantly ↓ in the upper brainstem of PD compared to HC.  -This reduction in GABA + levels could serve as an early biomarker for PD. |

| **Authors, year** | **Software** | **Output measures** | **Quantification reference** | **GABA/ GABA+** | **Key results** |
| --- | --- | --- | --- | --- | --- |
| Seger et al,  2021[40] | FID-A, LCModel 6.3-0I | GABA | Water | PD: 1.50 ± 0.26;  HC: 1.26 ± 0.31 | -Putaminal GABA levels are significantly ↑in PD compared to HC.  -↑ GABA levels are associated with a ↓ dopaminergic response.  - Independent predictors of both absolute and relative treatment responses, with an inverse correlation observed between GABA levels and treatment efficacy.  -Suggests significant role of nondopaminergic neurotransmitters in motor response in PD. |
| Delli Pizzi et al, 2022 [41] | Gannet | GABA+ | tCr | PD + SSD:0.113 ± 0.028;  PD: 0.084 ± 0.020;  SSD: 0.116 ± 0.026;  HC: 0.083 ± 0.020 | -PD+SSD, SSD exhibited ↑ GABA levels in the mPFC in comparison to HC or PD-SSD. |
| Trujillo et al, 2022 [42] | Gannet 3.0 | GABA+ | Water | Values NR.  Thalamic response to DA reduced in PD+ICD.  No difference in MC. | -PD+ICD has a significantly ↓ thalamic GABA response to DA and correlated with ↑ impulsivity scores.  -Findings highlight the role of dopamine therapy in modulating thalamic GABA concentrations and its potential impact on ICD. |
| Shukla et al, 2023 [43] | KALPANA | GABA+ | Absolute | SN(Absolute)-  PD: 3.2 ±0.86  HC: 3.51 ± 0.81;  SN(PVC)-  PD: 4.58 ± 1.21,  HC: 4.84 ± 1.15 | -Significant ↓ of GSH in SN and LH of PD patients compared HC.  -No significant change in GABA. |
| Liu et al, 2024 [44] | Gannet 3.1 | GABA+ | tCr, Water | Values NR.  -GABA+ levels ↑ in the MFC of PD+D vs PD-D. -No significant differences in GABA+ levels between PD and HC, no difference in OFF vs ON states | -GABA+ and Glx levels were not significantly different between PD and HC.  -In PD+D, GABA+ levels were ↑ in the MFC compared to PD-D.  -Link between ↑ GABA+ levels and depressive symptoms. |
| Tian et al, 2024 [45] | Gannet | GABA | tCr | EOPD: 0.08 ± 0.02,  LOPD: 0.05 ± 0.02,  Young HC: 0.11 ± 0.02, Old HC: 0.09 ± 0.02 | -GABA levels were ↓ in PD, indicating role of GABAergic dysfunction  -Suggest neurotransmitter and morphological changes as potential markers for early diagnosis and progression of PD, especially early-onset PD. |
| Yan et al, 2025 [46] | Gannet 3.0 | GABA+ | tCr | PD: 0.12 ± 0.03,  HC: 0.14 ± 0.02 | PD has ↓ midbrain GABA levels, indicating neurotransmitter imbalance. |

AMARES: Advanced method for accurate, robust, and efficient spectral fitting; AR: Akinetic rigid; BG: Basal ganglia; CSF: Cerebrospinal fluid; EOPD: Early onset Parkinson's disease; FID-A: Free induction decay-appliance; GABA: Gamma amino butyric acid; Gln: Glutamine; Glu: Glutamate; Glx: Glutamate + glutamine; GSH: Glutathione; HC: Healthy controls; ICD: Impulse control disorder; jMRUI: ava based Magnetic Resonance User Interface; LCModel: Linear Combination of MODEL spectra; LOPD: Late onset Parkinson's disease; MC: Motor cortex; mPFC: Medial Prefrontal cortex; NR: Not reported; PD: Parkinson's disease; PD-D: Parkinson's disease without depression; PD-ICD: Parkinson's disease without impulse control disorder; PD-SSD: Parkinson's disease without somatic symptom disorder; PD-VH: Parkinson's disease without visual hallucinations; PD+D: Parkinson's disease with depression; PD+ICD: Parkinson's disease with impulse control disorder; PD+SSD: Parkinson's disease with somatic symptom disorder; PD+VH: Parkinson's disease with visual hallucinations; PFC: Prefrontal cortex; PIGD: Postural instability ang gait disturbance; PVC: Partial volume correction; SSD: Somatic symptom disorder; STEAM: Stimulated echo acquisition model; tCr: Total creatine(creatine + phosphocreatine); TDPD: Tremor dominant Parkinson's disease; UPDRS: Unified Parkinson's disease ratings scale
