# Supplementary material for: GABAergic dysfunction in Parkinson’s disease: Insights from in vivo proton magnetic resonance spectroscopy
Source: Research Square preprint supplement (doi:10.21203/rs.3.rs-8407027/v1), 2025-12-30
Supplement: Supplementary file 2 [file c5da70f39f7ce81dffaa1517.docx]

**Table 1:** Demographic and clinical details of subjects in studies evaluating GABA in patients with Parkinson’s disease

| **Authors, year** | **Sample size** | **Gender**  **(M:F)** | **Age** | **Duration of illness** | **MDS-UPDRS-III/ UPDRS-III (OFF)** | **MDS-UPDRS-III/ UPDRS-III (ON)** | **LEDD** |
| --- | --- | --- | --- | --- | --- | --- | --- |
| Oz et al,  2006 [25] | PD: 10;  HC: 11 | PD: 4:6;  HC: 4:7 | PD: 59 ± 10;  HC: 59 ± 8 | 2.3 ± 1.5 | NR | NR | NR |
| Emir et al,  2012 [26] | PD: 13;  HC:12 | PD: 6:7;  HC: 7:5 | PD: 56 ± 10;  HC: 54 ± 8 | 7.5 ± 14 | 30.6 ± 9.2 | NR | Pons: 380.4±298.9 (n=11);  Putamen: 342.6±298.2 (n=11);  SN: 350.0±395.2 (n=5) |
| Dharmadhikari et al, 2015 [27] | PD: 19;  HC: 18 | PD: 10:9;  HC: 11:7 | PD: 63.38 ± 9.12;  HC: 59.63 ± 10.24 | 0.75-11*  No mean, SD, median | 33.34 ± 10.90 | NR | NR |
| O'Gormon Tuura et al, 2018 [28] | PD:20;  HC: 17 | PD: 16:4;  HC: 13:4 | PD: 63 ± 6.8;  HC: 62 ± 12.8 | 9.25 ± 4.16* calculated from table | NR | 27.95 ± 8.18* | 1058.75 ± 360.66* |
| Elmaki et al,  2018 [29] | PD:21;  HC:15 | PD: 13:8;  HC: 11:4 | PD: 61.24 ± 9.31; HC: 57.13 ± 7.15 | 3.5 ± 2.7 | 31.2 ± 7.9 | NR | NR |
| Gong et al,  2018[30] | TDPD: 9;  PIGD: 13;  HC: 16 | TDPD: 3:6;  PIGD: 5:8;  HC: 7:9 | TDPD: 58.8 ± 7.7; PIGD: 59.8 ± 8.4; HC: 66 ± 9.9 | TDPD: 3.8 ± 3.4; PIGD: 3.3 ± 1.7 | TDPD: 32.1 ± 9.9;  PIGD: 30.2 ± 7.7 | NR | NR |
| O'Gormon Tuura et al, 2018 [31] | PD: 16;  HC:16 | PD 13:3;  HC: 12:4 | PD 65;  HC: 62  *No SD | 9.68 ± 3.94 | NR | Pre-DBS:27.62 ± 8.15 (n=16);  Post-DBS: 16.92 ± 6.46 (n=14) | Pre-DBS: 1053.12 ± 371 (n=16);  Post-DBS: 354.28 ± 307.07 (n=14) |
| Firbank et al,  2018 [32] | PD+VH: 19;  PD-VH: 17;  HC: 20 | PD+VH: 13:4;  PD-VH: 13:4;  HC: 14:6 | PD+VH: 75.5 ± 4.5;  PD-VH: 72.3 ± 5.1; HC: 75.4 ± 5 | PD+VH: 11 ± 7.4; PD-VH: 9.6 ± 6.5 | PD+VH: 34.7 ± 18.8;  PD-VH: 55.9 ± 19.3 | NR | PD+VH: 717.3 ± 421.7;  PD-VH: 673.5 ± 428.2*  ?LEDD |
| Pesch et al,  2019 [33] | PD: 35  -AR: 19;  -MPD: 16;  HC: 35 | PD: 35:0  -AR: 19:0;  -MPD: 16:0;  HC: 35:0 | PD: 59  -AR: 60;  -MPD: 59;  HC: 55  *Median | PD: 4.7(2.5-7.7  -AR: 6(3.6-8.8);  -MPD: 3.5(1.5-5.4))  *Median, IQR | PD: 34(23-43) -AR: 34(24-43);  -MPD: 34.5(25.5-45.5))  *Median, IQR | NR | NR |

| **Authors, year** | **Sample size** | **Gender**  **(M:F)** | **Age** | **Duration of illness** | **MDS-UPDRS-III/ UPDRS-III (OFF)** | **MDS-UPDRS-III/ UPDRS-III (ON)** | **LEDD** |
| --- | --- | --- | --- | --- | --- | --- | --- |
| Piras et al,  2020 [34] | PD: 20;  HC: 20 | PD: 10:10;  HC: 12:8 | PD: 58.8 ± 9.6;  HC: 54.25 ± 16.62 | 3.51 ± 1.78 | NR | 12.30 ± 6.01 *?ON | 335.0 ± 260.99 |
| van Nuland et al, 2020 [35] | Dopa res tremor: 17;  Dopa resp tremor: 23;  No tremor: 20;  HC: 22 | Dopa res tremor: 13:4;  Dopa resp tremor: 9:14;  No tremor: 11:9; HC: 12:10 | Dopa res tremor: 60.9 ± 9.6;  Dopa resp tremor: 61.3 ± 12.8;  No tremor: 60.2 ± 9.2;  HC: 63.1 ± 10.5 | Dopa res tremor: 2.6 ± 1.8;  Dopa resp tremor: 5.7 ± 5.4;  No tremor: 5.1 ± 2.1 | NR *sub-scores reported: axial, brady + rig, rest tremor, tremor, brady+rig | NR | Dopa res tremor: 381±329;  Dopa resp tremor: 518±289;  No tremor: 645±503 |
| Delli Pizzi et al, 2020 [36] | PD+ SSD: 23;  PD-SSD: 19;  SSD: 14;  HC: 19 | PD+ SSD: 14:9;  PD-SSD: 14:5;  SSD: 7:7; HC: 11:8 | PD+ SSD: 66.3 ± 7.9;  PD-SSD: 66.7 ± 7; SSD: 64.8 ± 7.3;  HC: 64.8 ± 10.3 | PD+ SSD: 4.6 ± 2.1;  PD-SSD: 3.5 ± 2.3 | NR | PD+SSD: 14.3 ± 6.1;  PD-SSD: 13.8 ± 6.0 *? ON state | NR |
| Parkin et al,  2021[37] | PD:17;  Young HC:20;  Older HC: 18 | PD: 8:9;  Young HC: 10:10;  Older HC: 8:10 | PD:61.3 ± 7.2:  Young HC: 16.7 ± 5;  Older HC: 61.3 ± 6.8 | 5 ± 3.1 | 30.47 ± 12.10 | NR | 475.48 ± 351.57 |
| Song et al,  2021[38] | PD: 11;  HC: 11 | PD: 6:5;  HC: 7:4 | PD: 60.7 ± 8.7;  HC: 53.7 ± 16.1 | 3.4 ± 1.8 | 30.1 ± 7.9 | 15.5 ± 7.9 | NR |
| Song et al, 2021[39] | PD: 18;  HC: 18 | PD: 8:10;  HC: 11:7 | PD: 60.7 ± 7.6;  HC: 56.2 ± 11 | 2.9 ± 1.5 | 32.1 ± 7.6 | NR | NR |
| Seger et al,  2021[40] | PD: 19;  HC: 11 | PD: 14:5;  HC: 9:4 | PD: 64.9 ± 8.7;  HC: 68.9 ± 8 | 5.7 ± 4.2 | 36.9 ± 16.4 | 25.5 ± 11 | 535 ± 448 |
| Delli Pizzi et al, 2022 [41] | PD+SSD: 18;  PD-SSD: 18; SSD: 13;  HC: 17 | PD+SSD: 10:8; PD-SSD: 14:4; SSD: 7:6; HC: 9:8 | PD+SSD: 65.9 ± 8.4;  PD-SSD: 66.7 ± 7.2; SSD: 63.8 ± 9.1;  HC: 64.6 ± 10.9 | PD+SSD: 4.7 ± 2.1;  PD-SSD: 3.7 ± 2.5 | PD+SSD: 13.6 ± 6.3; PD-SSD: 13.8 ± 6.2 | NR | NR |
| Trujillo et al, 2022 [42] | PD+ICD: 19; PD-ICD: 14 | PD+ICD: 10:9; PD-ICD: 9:5 | PD+ICD: 61.6 ± 6.5;  PD-ICD: 67.2 ± 7.4 | PD+ICD: 4.3 ± 3.3;  PD-ICD: 7.2 ± 4.2 | PD+ICD: 29.5 ± 14.2;  PD-ICD: 30.7 ± 10.6 | PD+ICD: 20.0 ± 9.9;  PD-ICD: 27.8 ± 10.6 | PD+ICD: 642.7±366.9;  PD-ICD: 792.2 ± 436.1 |

| **Authors, year** | **Sample size** | **Gender**  **(M:F)** | **Age** | **Duration of illness** | **MDS-UPDRS-III/ UPDRS-III (OFF)** | **MDS-UPDRS-III/ UPDRS-III (ON)** | **LEDD** |
| --- | --- | --- | --- | --- | --- | --- | --- |
| Shukla et al, 2023 [43] | PD: 38;  HC:30 | PD: 24:14; HC: 20:10 | PD: 69.07 ± 7.08;  HC: 66.16 ± 7.79 | NR | NR | NR | NR |
| Liu et al, 2024 [44] | PD+D: 19;  PD-D: 19;  HC: 24 | PD+D: 7:12;  PD-D: 31:33;  HC: 12:12 | PD+D: 62.8 ± 8.7; PD-D: 64.2 ± 7.9;  HC: 60.8 ± 8.4 | PD+D: 8.9 ± 5.5; PD-D: 7.5 ± 4.8 | PD+D: 30.6 ± 9.8;  PD-D: 35.1 ± 16.1 | PD+D: 18.5 ± 7.4;  PD-D: 17.9 ± 10.1 | NR |
| Tian et al, 2024 [45] | EOPD: 10;  LOPD: 40;  HC: 52 | EOPD: 7:3;  LOPD: 10:30; Young HC: 8:4;  Old HC: 10:30 | EOPD: 44.7 ± 5.5; LOPD: 66.3 ± 6.1; Young HC: 45.7 ± 3.1;  Old HC: 65.6 ± 6.6 | NR | NR | NR | NR |
| Yan et al, 2025 [46] | PD: 60; HC: 47 | PD: 24:36;  HC: 18:29 | PD: 59.43 ± 7.37;  HC: 57.11 ± 6.85 | 3 (1-4) *Median and IQR | 32 (18-45) * | NR | 475 (350-700)* |

AR: Akinetic rigid Parkinson's disease; brady: bradykinesia; DBS: Deep brain stimulation; Dopa res: Dopamine resistant; Dopa resp: Dopamine responsive; EOPD: Early onset Parkinson's disease; F: Female; HC: Healthy Controls; IQR: Interquartile range; LEDD: Levodopa Equivalent Daily Dose; LOPD: Late onset Parkinson's disease; M: Male; MDS-UPDRS: Movement Disorders Society-Unified Parkinson's Disease Rating Scale; MPD: Mixed variant of Parkinson's disease; NR: Not reported; PD: Parkinson's disease; PD-ICD: Parkinson's disease without impulse control disorder; PD-SSD: Parkinson's disease without somatic symptom disorder; PD-VH: Parkinson's disease without visual hallucinations; PD+ICD: Parkinson's disease with impulse control disorder; PD+SSD: Parkinson's disease with somatic symptom disorder; PD+VH: Parkinson's disease with visual hallucinations; PIGD: Postural Instability and gait disturbance variant of PD; rig: rigidity; SD: Standard deviation; SSD: Somatic symptom disorders; TDPD: Tremor dominant Parkinson's disease; UPDRS: Unified Parkinson's Disease Rating Scale
