# Supplementary material for: GABAergic dysfunction in Parkinson’s disease: Insights from in vivo proton magnetic resonance spectroscopy
Source: Research Square preprint supplement (doi:10.21203/rs.3.rs-8407027/v1), 2025-12-30
Supplement: Supplementary file 3 [file e51d4d69b33cab1f51bdf033.docx]

**Table-2**: Details of hardware, acquisition details of studies evaluating GABA in patients with Parkinson’s disease

| **Authors, year** | **Field strength** | **Manufacturer, Model** | **RF coil** | **Medication state while scanning** | **Pulse sequence** | **VOI location** | **VOI size** | **TR/TE** | **Number of excitations/**  **acquisitions** | **Water suppression method** | **Quality metrics** |
| --- | --- | --- | --- | --- | --- | --- | --- | --- | --- | --- | --- |
| Oz et al,  2006 [25] | 4T | Oxford Magnet Technology with INOVA console (Varian) | TEM volume coil (T)(R) | OFF | STEAM | Bilateral SN | 2.2mL | 4500/5ms, TM:42ms | NEX=400 | VAPOR | LW(PD/HC): 13.5±2.2/13.3±2.1; SNR(PD/HC): 6±1.2/6.5±0.8; CRLB: GABA<40 |
| Emir et al,  2012 [26] | 7T | Magnex with Siemens console | 16 channel  (T)(R) | OFF | STEAM | Pons;  Putamen;  SN | Pons: 30x10x15mm³;  Putamen: 12x8x18mm³;  SN:  6x13x13mm³ | 5000/8ms; TM: 32ms | Pons,  putamen:128;  SN: 384 | VAPOR | LW (PD/HC)-  Pons: 13.2±2.3/12.9±3; Putamen: 19.7±5.9/20.5±7.1;  SN: 24.6±3.9/20.8±4.9  SNR (PD/HC)-  Pons: 15.1±1.9/16.2±1.7; Putamen: 11.0±2.8/10.5±2.5;  SN: 5.8±1.6/7.5±1.2 |
| Dharmadhikari et al, 2015 [27] | 3T | Siemens Magnetom Tim Trio | NR | OFF  (3, drug naïve) | MEGA-PRESS | Right thalamus; Right striatum | 25x30x25mm3 | 2000/68ms | 256 | NR | LW(PD/HC)-  Thalamus: 21.35 ± 4.1/18.14 ± 3.2  Striatum: 23.91 ± 2.8/ 24.09 ± 2.2;  SNR (PD/HC)-  Thalamus:18.64 ± 4.7/23.06 ± 5.4)  Striatum: 17.91 ± 2.8/ 18.71 ± 4.1;  CRLB(PD/HC)- Thalamus:12.44 ± 2.1/12.87 ± 1.8  Striatum: 10.81 ± 1.9/12.14 ± 3.2 |

| **Authors, year** | **Field strength** | **Manufacturer, Model** | **RF coil** | **Medication state while scanning** | **Pulse sequence** | **VOI location** | **VOI size** | **TR/TE** | **Number of excitations/**  **acquisitions** | **Water suppression method** | **Quality metrics** |
| --- | --- | --- | --- | --- | --- | --- | --- | --- | --- | --- | --- |
| O'Gormon Tuura et al, 2018 [28] | 3T | GE MR750 | 8 channel (R) | OFF | MEGA-PRESS | Left basal ganglia; Left PFC | 30mL | 1800/69ms | 320 | NR | NR |
| Elmaki et al,  2018 [29] | 3T | Philips Achieva TX | 8 channel phased-array (T)(R) | OFF | MEGA-PRESS | Left basal ganglia | 30x30x  20mm3 | 2000/68ms | 320 | NR | GABA+ fit error (PD/HC): 5.73±2.18%/5.51±1.20% |
| Gong et al,  2018[30] | 3T | Philips Achieva TX | 8 channel phased-array (R) | OFF | MEGA-PRESS | Left basal ganglia | 30x30x  20mm3 | 2000/68ms | 256 | CHESS | NR |
| O'Gormon Tuura et al, 2018 [31] | 3T | GE MR750 | 8 channel (R) | OFF | MEGA-PRESS | Left basal ganglia | 30mL | 1800/69ms | 320 | NR | NR |
| Firbank et al,  2018 [32] | 3T | Philips Achieva | 8 channel (R) | ON | MEGA-PRESS | Occipital lobe (midline) | 45x32x  20mm3 | 2000/68ms | 320 | VAPOR | NR |
| Pesch et al,  2019 [33] | 3T | Philips Achieva X series | 32 channel (R) | ON | MEGA-PRESS | Thalamus; Striatum (head of caudate, putamen, part of GPi) | 30x30x  25mm3 | 2000/68ms | 256 | NR | NR |
| Piras et al,  2020 [34] | 3T | Philips Achieva | 32 channel  (R) | NR  ?ON | MEGA-PRESS | Left and right cerebellar hemisphere | 30x30x  30mm3 | 2000/68ms | 256 | NR | NR |

| **Authors, year** | **Field strength** | **Manufacturer, Model** | **RF coil** | **Medication state while scanning** | **Pulse sequence** | **VOI location** | **VOI size** | **TR/TE** | **Number of excitations/**  **acquisitions** | **Water suppression method** | **Quality metrics** |
| --- | --- | --- | --- | --- | --- | --- | --- | --- | --- | --- | --- |
| van Nuland et al, 2020 [35] | 3T | Siemens Prisma | 32 channel  (R) | OFF and ON (200/50) | MEGA-PRESS | Thalamus, MC, VC *contralateral to side with more prominent motor symptoms | 18x24x  18mm3 | 1500/68ms | 96-Thalamus, 128-MC | CHESS | FWHM (PD/HC)-  Thalamus: 9.2±4.4/9.6±4.5; MC: 7.3±2.1/7.4±2.8; VC:7.4±3.0/7.7±3.2  CRLB (PD/HC)-  Thalamus: 24.1±13.9/22.6±13.4; MC: 15.3±5.5/14.5±5.8; VC:17.9±10.0/  16.8±11 |
| Delli Pizzi et al, 2020 [36] | 3T | Philips Achieva | 8 channel phased-array (R) | OFF | MEGA-PRESS | mPFC | 20x30x30mm3 | 2000/68ms | 320 | CHESS | CRLB<20 |
| Parkin et al,  2021[37] | 3T | Siemens Magnetom Verio | 32 channel  (R) | OFF | MEGA-PRESS | Mid-DLPFC | 20x20x20mm3 | 2000/68ms | 128 | VAPOR | FWHM: 8.9-17.9 |
| Song et al,  2021[38] | 3T | Philips Achieva TX | 8 channel phased-array (R) | OFF and ON | MEGA-PRESS | Upper brainstem | 10x25x20mm3 | 2000/68ms | 320 | MOIST | NR |
| Song et al, 2021[39] | 3T | Philips Achieva TX | 8 channel phased-array (R) | OFF | MEGA-PRESS | Upper brainstem | 10x25x30mm3 (7.5mL) | 2000/68ms | 320 | MOIST | Values NR. Figure 3: FWHM approx. PD:9, HC:8 |
| Seger et al,  2021[40] | 7T | Siemens Terra | NR | ON | STEAM | Left putamen | 14x32x17mm3 | 8000/4ms; TM:28ms | 72 | NR | LW (PD/HC): 0.06±0.01ppm/0.06±0.01ppm;  SNR (PD/HC): 28.4±6.6; 32.9±9;  CRLB (PD/HC): 10.8±2.2/11.5±2.5 |

| **Authors, year** | **Field strength** | **Manufacturer, Model** | **RF coil** | **Medication state while scanning** | **Pulse sequence** | **VOI location** | **VOI size** | **TR/TE** | **Number of excitations/**  **acquisitions** | **Water suppression method** | **Quality metrics** |
| --- | --- | --- | --- | --- | --- | --- | --- | --- | --- | --- | --- |
| Delli Pizzi et al, 2022 [41] | 3T | Philips Achieva | NR | OFF | MEGA-PRESS | mPFC | 20x30x  30cm3 | 2000/68ms | 320 | NR | NR; SNR: Compared to “Big GABA” |
| Trujillo et al, 2022 [42] | 3T | Philips Achieva | 32 channel (R) | OFF and ON (only DA) | MEGA-PRESS | Right thalamus, right MC | Thalamus: 30x22x  28mm3; MC: 40x25x  25mm3 | 3000/68ms | 320 | NR | NR |
| Shukla et al, 2023 [43] | 3T | Philips Achieva | Dual tuned 1H/31P (T)(R) | NR | MEGA-PRESS | SN, Left hippocampus  (GSH) | 30x35x  25mm3 | 2500/120ms | 320 | CHESS | FWHM, values NR |
| Liu et al, 2024 [44] | 3T | Philips Ingenia Elition | 32 channel (R) | ON,  OFF and ON (n=15) | MEGA-PRESS | Left thalamus, Left MFC | 30x22x  28mm3 | 2000/68ms | 288 | VAPOR | FWHM (PD/HC)-  Thalamus: 10.93±1.20/11.24±1.34; MC: 10.53±1.66/10.57±2.13  SNR (GABA-PD/HC)-  MFC: 17.04±2.42/ 18.86±1.63;  MC: 16.44±2.78/ 15.93±0.85 |
| Tian et al, 2024 [45] | 3T | Philips Ingenia Elition | 32 channel  (R) | OFF | MEGA-PRESS | Left sensori-motor cortex | 30x30x  30mm3 | 2000/68ms | 320 | VAPOR | FWHM<25;  CRLB<15 |
| Yan et al, 2025 [46] | 3T | Philips Elition X | 32 channel (R) | OFF | MEGA-PRESS | Midbrain | 15x25x  30mm3 | 2000/68ms | 128 | VAPOR | FWHM (PD/HC)-  9.19±1.26/ 9.39±0.91 |

1H: Hydrogen; 31P: Phosphorous; CHESS: Chemical shift selective saturation; DA: Dopamine agonist; DLPFC: Dorsolateral prefrontal cortex; FWHM: Full-width at half maximum, GPi: Globus pallidus interna; GSH: Glutathione; LW: Line width; MC: Motor cortex; MEGA-PRESS: MEscher-GArwood point-resolved spectroscopy; MFC: Medial frontal cortex; MOIST: Multiple optimizations insensitive suppression train; mPFC: Medial prefrontal cortex; NEX: Number of excitations; NR: Not reported; PFC: Prefrontal cortex; (R): Receive only; RF: Radiofrequency; SN: Substantia nigra; STEAM: STimulated echo acquisition mode; (T): Transmit; TE: Echo time; TEM: Transverse electromagnetic; TM: Mixing time; TR: Repetition time; VAPOR: Variable power radiofrequency pulses with optimized relaxation delays; VC: Visual cortex; VOI: Voxel of interest. Quality metrics: Signal to noise ratio, line-width, full-width at half maximum
